# Supplementary material
Source: PubMed Central journal article supplement (PMC4167478)
Supplement: NIHMS614880-supplement-01.pdf [file NIHMS614880-supplement-01.pdf]

**Supplemental Digital Content - Table 1: Clinical Adherence Indicators Evaluated for All 4 Treatment locations - Pre-hospital (PH), Emergency Department (ED), Operating Room (OR), and Intensive Care Unit (ICU).**

| Indicators                                                                                             | Definition and coding                                                                                                                                                       | PH Indicator (n=5) | ED Indicator (n=5) | OR Indicator (n=10) | ICU Indicator (n=14) |
|--------------------------------------------------------------------------------------------------------|-----------------------------------------------------------------------------------------------------------------------------------------------------------------------------|--------------------|--------------------|---------------------|----------------------|
| <b>1. Direct transfer to pediatric trauma center</b>                                                   | 0 = Not direct transfer<br>1 = Direct transfer                                                                                                                              | X                  |                    |                     |                      |
| <b>2. Hypoxia treated in 30 minutes after onset</b><br><br><i>Condition: Hypoxia</i>                   | 0 = Hypoxic and not treated with O2<br>0 = Hypoxic and treated >30 minutes<br>1 = Hypoxic but treated with O2 ≤ 30 minutes<br>2 = No hypoxia (All SaO <sub>2</sub> -normal) | X                  | X                  | X                   | X                    |
| <b>3. Supplemental oxygen administered</b>                                                             | 0 = No<br>1 = Yes                                                                                                                                                           | X                  | X                  | X                   | X                    |
| <b>4. Systemic hypotension treated within 30 min of admission</b><br><br><i>Condition: Hypotension</i> | 0 = Hypotensive and not treated<br>0 = Hypotensive and treated >30 minutes after hypotension onset<br>1 = Hypotensive but treated in ≤ 30 minutes<br>2 = No hypotension     | X                  | X                  | X                   | X                    |
| <b>5. Hypertonic saline or Mannitol for high ICP</b><br><br><i>Condition: High ICP</i>                 | 0 = Neither hypertonic saline nor Mannitol provided for patient with high ICP<br>1 = Hypertonic saline or Mannitol provided for patient with high ICP<br>2 = No high ICP    | X                  | X                  | X                   | X                    |
| <b>6. Fever control T&lt;38.5C</b>                                                                     | 0 = Any Temperature ≥ 38.5C<br>1 = All Temperature < 38.5C                                                                                                                  |                    | X                  | X                   | X                    |
| <b>7. All CPP&gt;40mmHg</b>                                                                            | 0 = Any CPP ≤ 40mmHg<br>1 = All CPP > 40mmHg                                                                                                                                |                    |                    | X                   | X                    |

|                                                                                                    |                                                                                                                                                                                                                                              |  |  |   |   |
|----------------------------------------------------------------------------------------------------|----------------------------------------------------------------------------------------------------------------------------------------------------------------------------------------------------------------------------------------------|--|--|---|---|
| <b>8. ICP monitoring within 4 hours of admission</b>                                               | 0 = No ICP monitoring<br>0 = ICP monitoring provided > 4 hours after center admission<br>1 = ICP monitoring provided ≤ 4 hours after center admission                                                                                        |  |  |   | X |
| <b>9. Neuromuscular blockade monitored</b><br><br><i>Condition: NM Blockade given</i>              | 0 = NMB not monitored<br>1 = NMB monitored<br>2 = No Neuromuscular blockade given                                                                                                                                                            |  |  | X | X |
| <b>10. Normocarbica in the absence of herniation and Hypocarbica in the presence of herniation</b> | 0= PaCO <sub>2</sub> >30 mmHg, cerebral herniation present<br>0= PaCO <sub>2</sub> ≤ 30 mmHg, no cerebral herniation<br>1 =PaCO <sub>2</sub> ≤ 30 mmHg, cerebral herniation present<br>1 =PaCO <sub>2</sub> >30 mmHg, no cerebral herniation |  |  |   | X |
| <b>11. External ventricular drain (EVD) used for high ICP</b><br><br><i>Condition: high ICP</i>    | 0 = EVD not used <i>with high ICP</i><br>1 = EVD used <i>with high ICP</i><br>2 = No high ICP                                                                                                                                                |  |  | X | X |
| <b>12.Barbiturates used for high ICP</b><br><br><i>Condition: High ICP</i>                         | 0 = No barbiturates used <i>with high ICP</i><br>1 = Barbiturates used <i>with high ICP</i><br>2 = No high ICP                                                                                                                               |  |  | X | X |
| <b>13.Antiepileptic medication to prevent early seizures</b>                                       | 0 = No anti-epileptics administered<br>1 = Anti-epileptics administered                                                                                                                                                                      |  |  |   | X |
| <b>14.Steroids not used</b>                                                                        | 0 = Steroids administered<br>1= Steroids not administered                                                                                                                                                                                    |  |  |   | X |

|                                                                                                                                                                                                                           |                                                                                                                                                                                                                                                                                            |  |  |   |   |
|---------------------------------------------------------------------------------------------------------------------------------------------------------------------------------------------------------------------------|--------------------------------------------------------------------------------------------------------------------------------------------------------------------------------------------------------------------------------------------------------------------------------------------|--|--|---|---|
| <b>15.Nutrition started in 72 hours after ICU admission</b>                                                                                                                                                               | 0 = Nutrition not started<br>0 = Nutrition start >72 hours after ICU admission<br>1 = Nutrition start ≤ 72 hours after ICU admission                                                                                                                                                       |  |  |   | X |
| <b>16.Decompressive Craniectomy(DC) for high ICP or/and SDH or/and EDH or/and cerebral edema within 48hrs of admission to trauma center</b><br><br><b>Condition: High ICP or/and SDH or/and EDH or/and cerebral edema</b> | 0=DC not performed <i>for</i> high ICP <i>or/and</i> SDH <i>or/and</i> EDH <i>or/and</i> cerebral edema<br>1=DC performed for high ICP <i>or/and</i> SDH <i>or/and</i> EDH <i>or/and</i> cerebral edema<br>2=No high ICP <i>or /and</i> SDH <i>or/and</i> EDH <i>or/and</i> cerebral edema |  |  | X |   |

Prehospital (PH) includes EMS (flight + ambulance or ambulance only) and Index hospital combined.

EDH = epidural hematoma, SDH = Subdural hematoma;

\*Systemic hypotension definition= systolic blood pressure < 70 + 2 (age [years]).

0 = Non-adherence, 1= Adherence, 2 = N/A. Some indicators are conditional as indicated above.

\*\* For each patient and indicator, lack of adherence received a value of 0 for that indicator and adherence received a value of 1. For adherence indicators relevant to a subset of patients (e.g., provision of hypertonic saline or mannitol is relevant to patients with high ICP), a third category with a value of two was added to accommodate patients for whom adherence was not relevant (Table 1).

X –Indicator is applicable in that specific location

**Supplemental Digital Content - Table 2: Clinical Characteristics of 236 Children with Severe Traumatic Brain Injury across Five Study Centers (Total and by Each Study Center). Procedures performed in 72 hours after admission.**

|                             | <b>Total<br/>n=236<br/>N(%)</b> | <b>Center 1<br/>n=50<br/>N(%)</b> | <b>Center 2<br/>n=42<br/>N(%)</b> | <b>Center 3<br/>n=40<br/>N(%)</b> | <b>Center 4<br/>n=56<br/>N(%)</b> | <b>Center 5<br/>n=48<br/>N(%)</b> |
|-----------------------------|---------------------------------|-----------------------------------|-----------------------------------|-----------------------------------|-----------------------------------|-----------------------------------|
| <b>Age (years) mean[SD]</b> | 8.0[6.3]                        | 8.5[5.6]                          | 3.3[4.8]                          | 6.7[6.1]                          | 11.2[6.1]                         | 9.0[5.9]                          |
| <b>Gender</b>               |                                 |                                   |                                   |                                   |                                   |                                   |
| Male                        | 163(69.1)                       | 32(64.0)                          | 26(61.9)                          | 27(67.5)                          | 41(73.2)                          | 37(77.1)                          |
| Female                      | 73(30.9)                        | 18(36.0)                          | 16(38.1)                          | 13(32.5)                          | 15(26.8)                          | 11(22.9)                          |
|                             |                                 |                                   |                                   |                                   |                                   |                                   |
| <b>Race</b>                 |                                 |                                   |                                   |                                   |                                   |                                   |
| White                       | 117(49.6)                       | 37(74.0)                          | 9(21.4)                           | 31(77.5)                          | 35(62.5)                          | 5(10.4)                           |
| Latino                      | 47(19.9)                        | 0                                 | 15(35.7)                          | 1(2.5)                            | 8(14.3)                           | 23(47.9)                          |
| Black                       | 55(23.3)                        | 10(20.0)                          | 14(33.3)                          | 6(15.0)                           | 7(12.5)                           | 18(37.5)                          |
| Asian                       | 6(2.5)                          | 0                                 | 0                                 | 0                                 | 4(7.1)                            | 2(4.2)                            |
| Other                       | 11(4.7)                         | 3(6.0)                            | 4(9.5)                            | 2(5.0)                            | 2(3.6)                            | 0                                 |
|                             |                                 |                                   |                                   |                                   |                                   |                                   |
| <b>Injury mechanism</b>     |                                 |                                   |                                   |                                   |                                   |                                   |
| Fall                        | 37(15.7)                        | 7(14.0)                           | 7(16.7)                           | 2(5.0)                            | 12(21.4)                          | 9(18.8)                           |
| Motor vehicle crash         | 51(21.6)                        | 7(14.0)                           | 3(7.1)                            | 13(32.5)                          | 20(35.7)                          | 8(16.7)                           |
| Struck by vehicle           | 50(21.2)                        | 9(18.0)                           | 3(7.1)                            | 5(12.5)                           | 14(25.0)                          | 19(39.6)                          |
| Abusive TBI                 | 60(25.4)                        | 13(26.0)                          | 25(59.5)                          | 13(32.5)                          | 2(3.6)                            | 7(14.6)                           |
| Gunshot                     | 14(5.9)                         | 2(4.0)                            | 2(4.8)                            | 4(10.0)                           | 3(5.4)                            | 3(6.3)                            |
| Sport/Recreation            | 15(6.4)                         | 9(18.0)                           | 1(2.4)                            | 1(2.5)                            | 2(3.6)                            | 2(4.2)                            |
| Other                       | 9(3.8)                          | 3(6.0)                            | 1(2.4)                            | 2(5.0)                            | 3(5.4)                            | 0(0.0)                            |
|                             |                                 |                                   |                                   |                                   |                                   |                                   |
| <b>Transportation</b>       |                                 |                                   |                                   |                                   |                                   |                                   |
| Private vehicle             | 4(1.7)                          | 0                                 | 0                                 | 4(10.0)                           | 0                                 | 0                                 |
| Flight                      | 47(19.9)                        | 25(50.0)                          | 4(9.5)                            | 17(42.5)                          | 1(1.8)                            | 0                                 |
| Ambulance                   | 145(61.4)                       | 20(40.0)                          | 38(90.5)                          | 18(45.0)                          | 21(37.5)                          | 48(100)                           |
| Flight/Ambulance            | 40(17.0)                        | 5(10.0)                           | 0                                 | 1(2.5)                            | 34(60.7)                          | 0                                 |

|                                                     |            |            |           |            |            |           |
|-----------------------------------------------------|------------|------------|-----------|------------|------------|-----------|
| <b>Transfer care</b>                                |            |            |           |            |            |           |
| None                                                | 5(2.1)     | 0          | 0         | 4(10.0)    | 0          | 1(2.1)    |
| BLS                                                 | 27(11.5)   | 0          | 9(21.4)   | 3(7.5)     | 0          | 15(31.3)  |
| ALS                                                 | 165(70.2)  | 48(98.0)   | 33(78.6)  | 24(60.0)   | 41(73.2)   | 19(39.6)  |
| ALS+BLS                                             | 38(16.2)   | 1(2.0)     | 0         | 9(22.5)    | 15(26.8)   | 13(27.1)  |
|                                                     |            |            |           |            |            |           |
| <b>Glasgow coma scale score (admit motor)</b>       |            |            |           |            |            |           |
| 6                                                   | 4(1.7)     | 0          | 0         | 2(5.0)     | 1(1.8)     | 1(2.1)    |
| 5                                                   | 39(16.5)   | 19(38.0)   | 6(14.3)   | 2(5.0)     | 4(7.1)     | 8(16.7)   |
| 4                                                   | 43(18.2)   | 8(16.0)    | 13(31.0)  | 4(10.0)    | 2(3.6)     | 16(33.3)  |
| 3                                                   | 21(8.9)    | 9(18.0)    | 1(2.4)    | 3(7.5)     | 3(5.4)     | 5(10.4)   |
| 2                                                   | 11(4.7)    | 6(12.0)    | 1(2.4)    | 2(5.0)     | 0          | 2(4.2)    |
| 1, not para                                         | 20(8.5)    | 4(8.0)     | 0(0.0)    | 1(2.5)     | 2(3.6)     | 13(27.1)  |
| 1, para                                             | 98(41.5)   | 4(8.0)     | 21(50.0)  | 26(65.0)   | 44(78.6)   | 3(6.3)    |
|                                                     |            |            |           |            |            |           |
| <b>Direct from scene</b>                            |            |            |           |            |            |           |
| No                                                  | 111(47.0)  | 27(54.0)   | 36(85.7)  | 20(50.0)   | 24(42.9)   | 4(8.3)    |
| Yes                                                 | 125(53.0)  | 23(46.0)   | 6(14.3)   | 20(50.0)   | 32(57.1)   | 44(91.7)  |
|                                                     |            |            |           |            |            |           |
| <b>Head abbreviated injury severity score (AIS)</b> |            |            |           |            |            |           |
| 3                                                   | 28(11.9)   | 2(4.0)     | 14(33.3)  | 4(10.0)    | 4(7.1)     | 4(8.3)    |
| 4                                                   | 80(33.9)   | 20(40.0)   | 25(59.5)  | 16(40.0)   | 6(10.7)    | 13(27.1)  |
| 5                                                   | 125(53.0)  | 27(54.0)   | 3(7.1)    | 19(47.5)   | 45(80.4)   | 31(64.6)  |
| 6                                                   | 3(1.3)     | 1(2.0)     | 0         | 1(2.5)     | 1(1.8)     | 0         |
|                                                     |            |            |           |            |            |           |
| <b>Injury severity score mean[SD]</b>               | 28.3[12.8] | 29.5[12.8] | 17.4[6.5] | 26.9[12.3] | 37.3[12.8] | 27.2[9.2] |
|                                                     |            |            |           |            |            |           |

|                                              |            |           |            |           |           |            |
|----------------------------------------------|------------|-----------|------------|-----------|-----------|------------|
| <b>Non head MAXAIS</b>                       |            |           |            |           |           |            |
| 0                                            | 54(22.9)   | 8(16.0)   | 19(45.2)   | 5(12.5)   | 1(1.8)    | 21(43.8)   |
| 1                                            | 58(24.6)   | 15(30.0)  | 7(16.7)    | 18(45.0)  | 14(25.0)  | 4(8.3)     |
| 2                                            | 36(15.3)   | 10(20.0)  | 10(23.8)   | 6(15.0)   | 4(7.1)    | 6(12.5)    |
| 3                                            | 60(25.4)   | 13(26.0)  | 5(11.9)    | 7(17.5)   | 24(42.9)  | 11(22.9)   |
| 4                                            | 22(9.3)    | 3(6.0)    | 1(2.4)     | 2(5.0)    | 10(17.9)  | 6(12.5)    |
| 5                                            | 5(2.1)     | 0         | 0          | 2(5.0)    | 3(5.4)    | 0          |
| 6                                            | 1(0.4)     | 1(2.0)    | 0          | 0         | 0         | 0          |
|                                              |            |           |            |           |           |            |
| <b>ICU length of stay (days) mean[SD]</b>    | 14.8[12.2] | 15.8[9.8] | 11.6[11.6] | 13.0[9.9] | 10.9[8.5] | 22.4[16.5] |
|                                              |            |           |            |           |           |            |
| <b>Extracranial injury</b>                   |            |           |            |           |           |            |
| No                                           | 66(28.0)   | 7(14.0)   | 19(45.2)   | 15(37.5)  | 8(14.3)   | 17(35.4)   |
| Yes                                          | 170(72.0)  | 43(86.0)  | 23(54.8)   | 25(62.5)  | 48(85.7)  | 31(64.6)   |
|                                              |            |           |            |           |           |            |
| <b>Injury location</b>                       |            |           |            |           |           |            |
| Face                                         | 106(44.9)  | 30(60.0)  | 10(23.8)   | 12(30.0)  | 37(66.1)  | 17(35.4)   |
| Neck                                         | 10(4.2)    | 2(4.0)    | 1(2.4)     | 0         | 7(12.5)   | 0          |
| Thorax                                       | 67(28.4)   | 13(26.0)  | 7(16.7)    | 8(20.0)   | 29(51.8)  | 10(20.8)   |
| Abdomen                                      | 48(20.3)   | 12(24.0)  | 4(9.5)     | 2(5.0)    | 23(41.1)  | 7(14.6)    |
| Spine                                        | 20(8.5)    | 4(8.0)    | 0          | 2(5.0)    | 13(23.2)  | 1(2.1)     |
| Extremities                                  | 112(47.5)  | 30(60.0)  | 10(23.8)   | 19(47.5)  | 30(53.6)  | 23(47.9)   |
|                                              |            |           |            |           |           |            |
| <b>All head computed tomograph diagnoses</b> |            |           |            |           |           |            |
| Epidural hematoma                            | 40(17.0)   | 12(24.0)  | 6(14.3)    | 4(10.0)   | 10(17.9)  | 8(16.7)    |
| Subdural Hematoma                            | 157(66.5)  | 36(72.0)  | 30(71.4)   | 29(72.5)  | 35(62.5)  | 27(56.3)   |
| Subarachnoid Hemorrhage                      | 108(45.8)  | 19(38.0)  | 8(19.1)    | 20(50.0)  | 33(58.9)  | 28(58.3)   |

|                                  |           |          |          |          |          |          |
|----------------------------------|-----------|----------|----------|----------|----------|----------|
| Intracerebral Hemorrhage         | 74(31.4)  | 10(20.0) | 6(14.3)  | 10(25.0) | 29(51.8) | 19(39.6) |
| Intraventricular Hemorrhage      | 47(19.9)  | 7(14.0)  | 3(7.1)   | 7(17.5)  | 21(37.5) | 9(18.8)  |
| Cerebral edema                   | 127(53.8) | 34(68.0) | 12(28.6) | 32(80.0) | 31(55.4) | 18(37.5) |
| Cerebral infarction              | 39(16.5)  | 13(26.0) | 10(23.8) | 2(5.0)   | 10(17.9) | 4(8.3)   |
| Contusion                        | 94(39.8)  | 30(60.0) | 8(19.1)  | 6(15.0)  | 26(46.4) | 24(50.0) |
| Diffuse axonal                   | 70(30.0)  | 18(36.0) | 8(19.1)  | 5(12.5)  | 30(53.6) | 9(18.8)  |
|                                  |           |          |          |          |          |          |
| <b>TBI history</b>               |           |          |          |          |          |          |
| Yes                              | 1(0.4)    | 1(2.0)   | 0        | 0        | 0        | 0        |
|                                  |           |          |          |          |          |          |
| <b>Medical condition</b>         |           |          |          |          |          |          |
| Yes                              | 46(19.5)  | 20(40.0) | 3(7.1)   | 2(5.0)   | 8(14.3)  | 13(27.1) |
|                                  |           |          |          |          |          |          |
| <b>Medical condition list</b>    |           |          |          |          |          |          |
| Cardiac                          | 2(0.9)    | 1(2.0)   | 0        | 1(2.5)   | 0        | 0        |
| Pulmonary                        | 19(8.1)   | 4(8.0)   | 1(2.4)   | 0        | 4(7.1)   | 10(20.8) |
| Neurology                        | 4(1.7)    | 2(4.0)   | 2(4.8)   | 0        | 0        | 0        |
| Endocrine                        | 1(0.4)    | 0        | 0        | 0        | 1(1.8)   | 0        |
| Other                            | 25(10.6)  | 15(30.0) | 1(2.4)   | 1(2.5)   | 4(7.1)   | 4(8.3)   |
|                                  |           |          |          |          |          |          |
| <b>Any surgery</b>               |           |          |          |          |          |          |
| No                               | 114(48.3) | 16(32.0) | 23(54.8) | 24(60.0) | 25(44.6) | 26(54.2) |
| Yes                              | 122(51.7) | 34(68.0) | 19(45.2) | 16(40.0) | 31(55.4) | 22(45.8) |
|                                  |           |          |          |          |          |          |
| <b>Decompressive craniectomy</b> |           |          |          |          |          |          |
| No                               | 51(41.8)  | 19(55.9) | 8(42.1)  | 2(12.5)  | 20(64.5) | 2(9.1)   |
| Yes                              | 71(58.2)  | 15(44.1) | 11(57.9) | 14(87.5) | 11(35.5) | 20(90.9) |

|                                              |           |          |          |          |          |          |
|----------------------------------------------|-----------|----------|----------|----------|----------|----------|
| <b>In-hospital death</b>                     |           |          |          |          |          |          |
| No                                           | 206(87.3) | 40(80.0) | 37(88.1) | 31(77.5) | 51(91.1) | 47(97.9) |
| Yes                                          | 30(12.7)  | 10(20.0) | 5(11.9)  | 9(22.5)  | 5(8.9)   | 1(2.1)   |
| <b>Discharge disposition</b>                 |           |          |          |          |          |          |
| Home                                         | 41(17.4)  | 7(14.0)  | 8(19.1)  | 10(25.0) | 7(12.5)  | 9(18.8)  |
| Outpatient rehabilitation                    | 2(0.8)    | 0        | 1(2.4)   | 1(2.5)   | 0        | 0        |
| Inpatient rehabilitation                     | 134(56.8) | 33(66.0) | 26(61.9) | 19(47.5) | 24(42.9) | 32(66.7) |
| Skilled nursing facility                     | 14(5.9)   | 0        | 2(4.8)   | 1(2.5)   | 10(17.9) | 1(2.1)   |
| Another facility                             | 15(6.4)   | 0        | 0        | 0        | 10(17.9) | 5(10.4)  |
| Dead                                         | 30(12.7)  | 10(20.0) | 5(11.9)  | 9(22.5)  | 5(8.9)   | 1(2.1)   |
|                                              |           |          |          |          |          |          |
| <b>Discharge Glasgow outcome scale score</b> |           |          |          |          |          |          |
| Dead                                         | 30(12.7)  | 10(20.0) | 5(11.9)  | 9(22.5)  | 5(8.9)   | 1(2.1)   |
| Alive but vegetative                         | 20(8.5)   | 4(8.0)   | 1(2.4)   | 2(5.0)   | 12(21.4) | 1(2.1)   |
| Alive with major impairment                  | 114(48.3) | 20(40.0) | 20(47.6) | 10(25.0) | 36(64.3) | 28(58.3) |
| Alive with min/mod impairment                | 56(23.7)  | 16(32.0) | 5(11.9)  | 19(47.5) | 2(3.6)   | 14(29.2) |
| Alive with baseline functioning              | 16(6.8)   | 0        | 11(26.2) | 0        | 1(1.8)   | 4(8.3)   |



**Supplemental Digital Content - Table 3: Detailed Clinical Characteristics and Adherence Rate of 236 Children with Severe Traumatic Brain Injury across Five Study Centers by Glasgow Outcome Scale [GOS] score.**

|                                          | <b>Total<br/>N (%)</b> | <b>GOS 1<br/>N (%)</b> | <b>GOS 2<br/>N (%)</b> | <b>GOS 3<br/>N (%)</b> | <b>GOS 4<br/>N (%)</b> | <b>GOS 5<br/>N (%)</b> | <b><i>P</i> value</b> |
|------------------------------------------|------------------------|------------------------|------------------------|------------------------|------------------------|------------------------|-----------------------|
| <b>Number of patients</b>                | 236(100)               | 30(12.7)               | 20 (8.5)               | 114 (48.3)             | 56 (23.7)              | 16 (6.8)               |                       |
| <b>Total adherence rate<br/>mean[SD]</b> | 72.8[8.9]              | 69.1[9.9]              | 72.6[10.3]             | 72.7[8.8]              | 74.9[8.1]              | 73.3[6.8]              | 0.15                  |
| <b>Age (years)<br/>mean[SD]</b>          | 8.0[6.3]               | 5.0[6.1]               | 9.6[6.3]               | 9.0[6.1]               | 7.5[6.0]               | 6.7[6.4]               | <b>&lt;0.0001</b>     |
| <b>Gender</b>                            |                        |                        |                        |                        |                        |                        | 0.45                  |
| Male                                     | 163(69.1)              | 21(70.0)               | 8(40.0)                | 85(74.6)               | 37(66.1)               | 12(75.0)               |                       |
| Female                                   | 73(30.9)               | 9(30.0)                | 12(60.0)               | 29(25.4)               | 19(33.9)               | 4(25.0)                |                       |
| <b>Race</b>                              |                        |                        |                        |                        |                        |                        | NA                    |
| White                                    | 117(49.6)              | 21(70.0)               | 11(55.0)               | 51(44.7)               | 31(55.4)               | 3(18.8)                |                       |
| Latino                                   | 47(19.9)               | 3(10.0)                | 3(15.0)                | 29(25.4)               | 6(10.7)                | 6(37.5)                |                       |
| Black                                    | 55(23.3)               | 5(16.7)                | 3(15.0)                | 26(22.8)               | 17(30.4)               | 4(25.0)                |                       |
| Asian                                    | 6(2.5)                 | 0(0.0)                 | 2(10.0)                | 2(1.7)                 | 0(0.0)                 | 2(12.5)                |                       |
| Other                                    | 11(4.7)                | 1(3.3)                 | 1(5.0)                 | 6(5.3)                 | 2(3.6)                 | 1(6.3)                 |                       |
| <b>Injury mechanism</b>                  |                        |                        |                        |                        |                        |                        | NA                    |
| Fall                                     | 37(15.7)               | 3(10.0)                | 5(25.0)                | 13(11.4)               | 10(17.9)               | 6(37.5)                |                       |
| Motor vehicle crash                      | 51(21.6)               | 3(10.0)                | 8(40.0)                | 28(24.6)               | 11(19.6)               | 1(6.2)                 |                       |
| Struck by vehicle                        | 50(21.2)               | 4(13.3)                | 3(15.0)                | 31(27.2)               | 10(17.9)               | 2(12.5)                |                       |
| Abusive TBI                              | 60(25.4)               | 14(46.7)               | 1(5.0)                 | 25(21.9)               | 15(26.8)               | 5(31.2)                |                       |
| Gunshot                                  | 14(5.9)                | 3(10.0)                | 1(5.0)                 | 6(5.3)                 | 3(5.4)                 | 1(6.3)                 |                       |
| Sport/Recreation                         | 15(6.3)                | 1(3.3)                 | 0(0.0)                 | 8(7.0)                 | 5(8.9)                 | 1(6.2)                 |                       |
| Other                                    | 9(3.9)                 | 2(6.7)                 | 2(10.0)                | 3(2.6)                 | 2(3.6)                 | 0(0.0)                 |                       |

|                                                                                                               |           |          |          |          |          |          |             |
|---------------------------------------------------------------------------------------------------------------|-----------|----------|----------|----------|----------|----------|-------------|
| <b>Transportation to study (trauma) center</b>                                                                |           |          |          |          |          |          | NA          |
| Private vehicle                                                                                               | 4(1.7)    | 1(3.3)   | 0(0.0)   | 1(0.9)   | 2(3.6)   | 0(0.0)   |             |
| Ambulance                                                                                                     | 145(61.4) | 16(53.3) | 8(40.0)  | 72(63.2) | 34(60.7) | 15(93.8) |             |
| Flight/Ambulance                                                                                              | 87(36.9)  | 13(43.4) | 12(60.0) | 41(35.9) | 20(35.7) | 1(6.2)   |             |
| <b>Highest pre-hospital transportation certification from scene to study center, including first hospital</b> |           |          |          |          |          |          | NA          |
| None                                                                                                          | 5(2.1)    | 1(3.3)   | 0(0.0)   | 1(0.9)   | 3(5.4)   | 0(0.0)   |             |
| BLS                                                                                                           | 27(11.5)  | 0(0.0)   | 0(0.0)   | 18(15.9) | 6(10.7)  | 3(18.8)  |             |
| ALS/ALS+BLS                                                                                                   | 203(86.4) | 29(96.7) | 20(100)  | 94(83.2) | 47(83.9) | 13(81.2) |             |
| <b>Glasgow coma scale score (admit motor)</b>                                                                 |           |          |          |          |          |          | NA          |
| 6                                                                                                             | 4(1.7)    | 0(0.0)   | 0(0.0)   | 2(1.8)   | 2(3.6)   | 0(0.0)   |             |
| 5                                                                                                             | 39(16.5)  | 2(6.7)   | 4(20.0)  | 14(12.3) | 15(26.8) | 4(25.0)  |             |
| 4                                                                                                             | 43(18.2)  | 1(3.3)   | 0(0.0)   | 21(18.4) | 17(30.4) | 4(25.0)  |             |
| 3                                                                                                             | 21(8.9)   | 2(6.7)   | 1(5.0)   | 10(8.8)  | 7(12.5)  | 1(6.3)   |             |
| 2                                                                                                             | 11(4.7)   | 2(6.7)   | 2(10.0)  | 6(5.3)   | 1(1.8)   | 0(0.0)   |             |
| 1, not paralyzed                                                                                              | 20(8.5)   | 5(16.7)  | 0(0.0)   | 15(13.2) | 0(0.0)   | 0(0.0)   |             |
| 1, paralyzed                                                                                                  | 98(41.5)  | 18(60.0) | 13(65.0) | 46(40.4) | 14(25.0) | 7(43.8)  |             |
| <b>Direct from scene</b>                                                                                      |           |          |          |          |          |          | <b>0.03</b> |
| No                                                                                                            | 111(47.0) | 22(73.3) | 10(50.0) | 44(38.6) | 24(42.9) | 11(68.8) |             |
| Yes                                                                                                           | 125(53.0) | 8(26.7)  | 10(50.0) | 70(61.4) | 32(57.1) | 5(31.2)  |             |
| <b>Head abbreviated injury severity score (AIS)</b>                                                           |           |          |          |          |          |          | NA          |
| 3                                                                                                             | 28(11.9)  | 3(10.0)  | 0(0.0)   | 14(12.3) | 8(14.3)  | 3(18.8)  |             |
| 4                                                                                                             | 80(33.9)  | 4(13.3)  | 4(20.0)  | 35(30.7) | 27(48.2) | 10(62.5) |             |
| 5                                                                                                             | 125(53.0) | 20(66.7) | 16(80.0) | 65(57.0) | 21(37.5) | 3(18.8)  |             |
| 6                                                                                                             | 3(1.3)    | 3(10.0)  | 0(0.0)   | 0(0.0)   | 0(0.0)   | 0(0.0)   |             |
|                                                                                                               |           |          |          |          |          |          |             |

|                                                                   |            |            |            |            |           |           |                   |
|-------------------------------------------------------------------|------------|------------|------------|------------|-----------|-----------|-------------------|
| <b>Injury severity score</b><br>mean[SD]                          | 28.3[12.8] | 34.1[18.5] | 36.4[12.3] | 29.2[11.7] | 23.5[8.3] | 17.1[5.9] | <b>&lt;0.0001</b> |
| <b>Non head MAXAIS</b>                                            |            |            |            |            |           |           | NA                |
| 0                                                                 | 54(22.9)   | 5(16.7)    | 1(5.0)     | 23(20.2)   | 13(23.2)  | 12(75.0)  |                   |
| 1                                                                 | 58(24.6)   | 10(33.3)   | 5(25.0)    | 24(21.0)   | 17(30.4)  | 2(12.5)   |                   |
| 2                                                                 | 36(15.2)   | 5(16.7)    | 1(5.0)     | 16(14.0)   | 12(21.4)  | 2(12.5)   |                   |
| 3                                                                 | 60(25.4)   | 8(26.7)    | 8(40.0)    | 33(29.0)   | 11(19.6)  | 0(0.0)    |                   |
| 4                                                                 | 22(9.3)    | 1(3.3)     | 4(20.0)    | 15(13.2)   | 2(3.6)    | 0(0.0)    |                   |
| 5                                                                 | 5(2.1)     | 0(0.0)     | 1(5.0)     | 3(2.6)     | 1(1.8)    | 0(0.0)    |                   |
| 6                                                                 | 1(0.4)     | 1(3.3)     | 0(0.0)     | 0(0.0)     | 0(0.0)    | 0(0.0)    |                   |
| <b>ICU length of stay</b><br><b>(days)</b> mean[SD]               | 14.8(12.2) | 8.2(9.0)   | 24.1(11.9) | 16.7(13.7) | 12.8(8.4) | 8.8(6.8)  | <b>&lt;0.0001</b> |
| <b>Extracranial injury</b>                                        |            |            |            |            |           |           | 0.45              |
| No                                                                | 66(28.0)   | 9(30.0)    | 1(5.0)     | 30(26.3)   | 16(28.6)  | 10(62.5)  |                   |
| Yes                                                               | 170(72.0)  | 21(70.0)   | 19(95.0)   | 84(73.7)   | 40(71.4)  | 6(37.5)   |                   |
| <b>Injury location</b>                                            |            |            |            |            |           |           |                   |
| Face                                                              | 106(44.9)  | 17(56.7)   | 10(50.0)   | 58(50.9)   | 17(30.4)  | 4(25.0)   | 0.34              |
| Neck                                                              | 10(4.2)    | 2(6.7)     | 1(5.0)     | 6(5.3)     | 1(1.8)    | 0(0.0)    | 0.70*             |
| Thorax                                                            | 67(28.4)   | 8(26.7)    | 10(50.0)   | 37(32.5)   | 11(19.6)  | 1(6.3)    | 0.21              |
| Abdomen                                                           | 48(20.3)   | 6(20.0)    | 8(40.0)    | 26(22.8)   | 7(12.5)   | 1(6.3)    | 0.66              |
| Spine                                                             | 20(8.5)    | 4(13.3)    | 2(10.0)    | 12(10.5)   | 2(3.6)    | 0(0.0)    | 0.30*             |
| Extremities                                                       | 112(47.5)  | 12(40.0)   | 11(55.0)   | 59(51.8)   | 28(50.0)  | 2(12.5)   | 0.35              |
| <b>All head computed</b><br><b>tomography</b><br><b>diagnoses</b> |            |            |            |            |           |           |                   |
| Epidural hematoma                                                 | 40(17.0)   | 6(20.0)    | 3(15.0)    | 16(14.0)   | 9(16.1)   | 6(37.5)   | <b>0.03</b>       |
| Subdural hematoma                                                 | 157(66.5)  | 25(83.3)   | 15(75.0)   | 69(60.5)   | 39(69.6)  | 9(56.3)   | 0.56              |
| Subarachnoid<br>hemorrhage                                        | 108(45.8)  | 20(66.7)   | 10(50.0)   | 57(50.0)   | 18(32.1)  | 3(18.8)   | 0.51              |
| Intracerebral<br>hemorrhage                                       | 74(31.4)   | 7(23.3)    | 10(50.0)   | 36(31.6)   | 16(28.6)  | 5(31.3)   | 0.40              |
| Intraventricular<br>hemorrhage                                    | 47(19.9)   | 6(20.0)    | 9(45.0)    | 26(22.8)   | 6(10.7)   | 0(0.0)    | <b>0.004*</b>     |

|                                                    |           |          |          |          |          |         |                    |
|----------------------------------------------------|-----------|----------|----------|----------|----------|---------|--------------------|
| Cerebral edema                                     | 127(53.8) | 26(86.7) | 18(90.0) | 59(51.8) | 24(42.9) | 0(0.0)  | <b>&lt;0.0001*</b> |
| Cerebral infarction                                | 39(16.5)  | 7(23.3)  | 7(35.0)  | 18(15.8) | 6(10.7)  | 1(6.3)  | 0.33               |
| Contusion                                          | 94(39.8)  | 10(33.3) | 9(45.0)  | 49(43.0) | 19(33.9) | 7(43.8) | 0.31               |
| Diffuse axonal injury                              | 70(29.7)  | 4(13.3)  | 11(55.0) | 46(40.4) | 8(14.3)  | 1(6.3)  | <b>0.01</b>        |
| <b>Surgery</b>                                     |           |          |          |          |          |         | 0.20               |
| No                                                 | 114(48.3) | 17(56.7) | 6(30.0)  | 54(47.4) | 30(53.6) | 7(43.8) |                    |
| Yes                                                | 122(51.7) | 13(43.3) | 14(70.0) | 60(52.6) | 26(46.4) | 9(56.2) |                    |
| <b>Decompressive Craniectomy</b>                   |           |          |          |          |          |         | <b>0.04*</b>       |
| No DC for high ICP or SDH or EDH or cerebral edema | 44(36.1)  | 2(15.4)  | 5(35.7)  | 29(48.3) | 7(26.9)  | 1(11.1) |                    |
| DC for high ICP or SDH or EDH or cerebral edema    | 71(58.2)  | 11(84.6) | 9(64.3)  | 25(41.7) | 18(69.2) | 8(88.9) |                    |
| No high ICP or SDH or EDH or cerebral edema        | 7(5.7)    | 0(0.0)   | 0(0.0)   | 6(10.0)  | 1(3.9)   | 0(0.0)  |                    |

\*p values are corrected by the design (cluster in hospitals). In cells with 0 values, p values could not be determined and are denoted by NA. For the dichotomized variables which had 0 cell, \*Fisher's Exact test was used (no clustering). Data as mean (SD). GOS 1 = dead, GOS 2 = vegetative state, GOS 3 = major impairment, GOS 4 = minor impairment, GOS 5 = pre-injury baseline

**Supplemental Digital Content - Table 4: Adherence Scorecard for Severe Pediatric Traumatic Brain Injury Indicators across Five Study Centers by Location (Pre-hospital [PH], Emergency Department [ED], Operating Room [OR] and Intensive Care Unit [ICU]).** Pre-hospital data (N=219) and ED data (N=224). 122/236 subjects underwent surgery in the first 72 hours after TBI contributing to OR data. N =236 for ICU.

|                                 |                                                               | <b>Total<br/>(n=236)<br/>%</b> | <b>Center<br/>1 (n=50)<br/>%</b> | <b>Center 2<br/>(n=42)<br/>%</b> | <b>Center 3<br/>(n=40)<br/>%</b> | <b>Center<br/>4 (n=56)<br/>%</b> | <b>Center<br/>5 (n=48)<br/>%</b> |
|---------------------------------|---------------------------------------------------------------|--------------------------------|----------------------------------|----------------------------------|----------------------------------|----------------------------------|----------------------------------|
| <b>Total Adherence Rate (%)</b> |                                                               | <b>73</b>                      | <b>76</b>                        | <b>68</b>                        | <b>73</b>                        | <b>69</b>                        | <b>78</b>                        |
| <b>PH Indicators (n=5)</b>      | <b>Indicator</b>                                              | <b>(n=219)<br/>%</b>           | <b>(n=47)<br/>%</b>              | <b>(n=42)<br/>%</b>              | <b>(n=32)<br/>%</b>              | <b>(n=55)<br/>%</b>              | <b>(n=43)<br/>%</b>              |
| Indicator 1                     | Direct transfer                                               | 49.8                           | 42.6                             | 14.3                             | 37.5                             | 56.4                             | 93                               |
| Indicator 2*                    | hypoxia treated in 30 minutes after onset                     | 93.8                           | 100                              | 100                              | 50                               | 100                              | 100                              |
| Indicator 3                     | Supplemental oxygen administered                              | 97.8                           | 95.7                             | 100                              | 93.8                             | 100                              | 97.7                             |
| Indicator 4*                    | systemic hypotension treated within 30 minutes of admission** | 88.6                           | 77.8                             | 87.5                             | 83.3                             | 100                              | 50.0                             |
| Indicator 5                     | Hypertonic saline or mannitol for high ICP                    | 64.7                           | 90.9                             | 72.7                             | 60.0                             | 50.0                             | 50.0                             |
| <b>PH Adherence rate (%)</b>    |                                                               | <b>76</b>                      | <b>73</b>                        | <b>64</b>                        | <b>65</b>                        | <b>79</b>                        | <b>94</b>                        |
| <b>ED indicators (n=5)</b>      |                                                               | <b>(n=224)<br/>%</b>           | <b>(n=47)<br/>%</b>              | <b>(n=35)<br/>%</b>              | <b>(n=40)<br/>%</b>              | <b>(n=56)<br/>%</b>              | <b>(n=46)<br/>%</b>              |
| Indicator 2*                    | hypoxia treated in 30 minutes after onset                     | 100                            | 100                              | 100                              | 100                              | 100                              | 100                              |
| Indicator 3*                    | Supplemental oxygen administered                              | 99.6                           | 97.9                             | 100                              | 100                              | 100                              | 100                              |
| Indicator 4                     | systemic hypotension treated within 30 min of admission**     | 96.6                           | 100                              | 100                              | 100                              | 100                              | 83.3                             |

|                              |                                                               |                  |                 |                 |                 |                 |                 |
|------------------------------|---------------------------------------------------------------|------------------|-----------------|-----------------|-----------------|-----------------|-----------------|
| Indicator 5                  | Hypertonic saline or mannitol for high ICP                    | 81.9             | 100             | 50.0            | 83.3            | 62.1            | 97.4            |
| Indicator 6                  | Fever control<br>T < 38.5C                                    | 90.6             | 83              | 97.1            | 97.5            | 87.5            | 91.3            |
| <b>ED Adherence rate (%)</b> |                                                               | <b>94</b>        | <b>93</b>       | <b>95</b>       | <b>98</b>       | <b>89</b>       | <b>96</b>       |
| <b>OR indicators (n10)</b>   |                                                               | <b>(n=122) %</b> | <b>(n=34) %</b> | <b>(n=19) %</b> | <b>(n=16) %</b> | <b>(n=31) %</b> | <b>(n=22) %</b> |
| Indicator 2*                 | hypoxia treated in 30 minutes after onset                     | 100              | --              | --              | 100             | 100             | 100             |
| Indicator 3*                 | Supplemental oxygen administered                              | 100              | 100             | 100             | 100             | 100             | 100             |
| Indicator 4*                 | systemic hypotension treated within 30 minutes of admission** | 98.3             | 93.8            | 100             | 100             | 100             | 100             |
| Indicator 5                  | Hypertonic saline or mannitol for high ICP                    | 78.2             | 70              | 50              | 100             | 63.2            | 100             |
| Indicator 6                  | Fever control<br>T < 38.5C                                    | 99.2             | 100             | 100             | 100             | 96.8            | 100             |
| Indicator 7                  | All<br>CPP > 40mmHg                                           | 90.2             | 91.2            | 89.5            | 87.5            | 83.9            | 100             |
| Indicator 9                  | Neuromuscular blockade monitored                              | 18.8             | 31              | 5.3             | 0               | 32.1            | 9.1             |
| Indicator 11*                | External ventricular drain used for high ICP                  | 54.5             | 50              | 75              | 75              | 15.8            | 88.9            |
| Indicator 12                 | Barbiturates used in high ICP                                 | 1.8              | 0               | 0               | 0               | 0               | 5.6             |

|                                      |                                                                                  |                               |                                 |                                 |                                 |                                 |                                 |
|--------------------------------------|----------------------------------------------------------------------------------|-------------------------------|---------------------------------|---------------------------------|---------------------------------|---------------------------------|---------------------------------|
| Indicator 16                         | Decompressive<br><br>Craniectomy<br>used in high<br>ICP <i>or/and</i><br>EDH/SDH | 62                            | 46.7                            | 62.5                            | 100                             | 36.7                            | 100                             |
| <b>OR<br/>Adherence<br/>rate (%)</b> |                                                                                  | <b>72</b>                     | <b>74</b>                       | <b>70</b>                       | <b>75</b>                       | <b>64</b>                       | <b>78</b>                       |
| <b>ICU<br/>indicators<br/>(n=14)</b> |                                                                                  | <b>(n=236)</b><br>%           | <b>(n=50)</b><br>%              | <b>(n=42)</b><br>%              | <b>(n=40)</b><br>%              | <b>(n=56)</b><br>%              | <b>(n=48)</b><br>%              |
| Indicator 2*                         | hypoxia treated<br>in 30 minutes<br>after onset                                  | 100                           | 100                             | 100                             | 100                             | 100                             | 100                             |
|                                      |                                                                                  | <b>Total<br/>(n=236)</b><br>% | <b>Center<br/>1 (n=50)</b><br>% | <b>Center 2<br/>(n=42)</b><br>% | <b>Center 3<br/>(n=40)</b><br>% | <b>Center<br/>4 (n=56)</b><br>% | <b>Center<br/>5 (n=48)</b><br>% |
| Indicator 3*                         | Supplemental<br>oxygen<br>administered                                           | 99.6                          | 100                             | 100                             | 97.5                            | 100                             | 100                             |
| Indicator 4*                         | systemic<br>hypotension<br>treated within<br>30 minutes of<br>admission**        | 98                            | 91.3                            | 100                             | 100                             | 100                             | 100                             |
| Indicator 5                          | Hypertonic<br>saline or<br>mannitol for<br>high ICP                              | 98.6                          | 83.7                            | 79                              | 81.3                            | 92.3                            | 100                             |
| Indicator 6                          | Fever control<br><br>T < 38.5C                                                   | 53.8                          | 76                              | 66.7                            | 75                              | 37.5                            | 20.8                            |
| Indicator 7                          | All<br><br>CPP ><br>40mmHg                                                       | 83.9                          | 90                              | 83.3                            | 82.5                            | 69.6                            | 95.8                            |
| Indicator 8                          | ICP monitoring<br>within 4 hours<br>of admission                                 | 64.4                          | 80                              | 23.8                            | 52.5                            | 69.6                            | 87.5                            |
| Indicator 9                          | Neuromuscular<br>blockade<br>monitored                                           | 3                             | 4                               | 4.8                             | 0                               | 0                               | 2.6                             |

|                                       |                                                                                 |           |           |           |           |           |           |
|---------------------------------------|---------------------------------------------------------------------------------|-----------|-----------|-----------|-----------|-----------|-----------|
| Indicator 10                          | Normocarbica<br>(PaCO <sub>2</sub><br>30-40mmHg) in<br>absence of<br>herniation | 45.5      | 52.4      | 0         | 36.8      | 12.5      | 100       |
| Indicator 11                          | External<br>ventricular<br>drain used for<br>high ICP                           | 79.3      | 97.7      | 52.6      | 84.4      | 23.1      | 79.1      |
| Indicator 12                          | Barbiturates<br>used in high<br>ICP                                             | 9.1       | 16.3      | 10.5      | 9.4       | 2.6       | 7         |
| Indicator 13                          | Antiepileptic<br>medication to<br>prevent early<br>seizures                     | 76.7      | 100       | 92.9      | 67.5      | 30.4      | 100       |
| Indicator 14                          | Steroids not<br>used                                                            | 90.3      | 84        | 81        | 90        | 100       | 93.8      |
| Indicator 15                          | Nutrition started<br>≤ 72 hours after<br>admission                              | 76.7      | 82        | 61.9      | 75        | 91.1      | 68.8      |
| <b>ICU<br/>Adherence<br/>rate (%)</b> |                                                                                 | <b>68</b> | <b>74</b> | <b>64</b> | <b>69</b> | <b>64</b> | <b>72</b> |

\*\*=systemic hypotension ( $70 + 2$  [age]; years).



**Supplemental Digital Content - Table 6: Association of Adherence to 2003 Pediatric Guidelines and Specific Indicators with Outcomes; all Treatment Locations Combined.**

|                                                                    | In-hospital mortality<br><i>aHR(95% CI)</i> | Vegetative/ Major<br>Impairment(ref=Baseline/Minor/Mod<br>Impairment)<br><i>aRR (95% CI)</i> |
|--------------------------------------------------------------------|---------------------------------------------|----------------------------------------------------------------------------------------------|
| <b><i>Indicators</i></b>                                           |                                             |                                                                                              |
| <b><i>PH Hypoxia treated within 30 minutes after onset</i></b>     |                                             |                                                                                              |
| Hypoxia present and untreated or treated >30 minutes               | 1.00(Ref)                                   |                                                                                              |
| Hypoxia present and treated with O <sub>2</sub> ≤ 30 minutes       | 0.27 (0.01, 5.11)                           |                                                                                              |
| No hypoxia present                                                 | <b>0.20 (0.08, 0.46)</b>                    |                                                                                              |
| <b><i>OR maintenance of CPP &gt; 40mmHg</i></b>                    |                                             |                                                                                              |
| Any CPP ≤ 40mmHg                                                   |                                             | 1.00 (Ref)                                                                                   |
| All CPP > 40 mmHg                                                  |                                             | <b>0.61 (0.58, 0.64)</b>                                                                     |
| No Surgery of any type                                             |                                             | <b>0.68 (0.53, 0.86)</b>                                                                     |
| <b><i>OR neuromuscular blockade monitoring</i></b>                 |                                             |                                                                                              |
| NMB not monitored                                                  |                                             | 1.00 (Ref)                                                                                   |
| NMB monitored                                                      |                                             | 1.13 (0.85,1.51)                                                                             |
| No NMB given                                                       |                                             | <b>1.37 (1.24,1.53)</b>                                                                      |
| <b><i>ICU maintenance of CPP &gt; 40mmHg</i></b>                   |                                             |                                                                                              |
| Any CPP ≤ 40mmHg                                                   |                                             | 1.00 (Ref)                                                                                   |
| All CPP > 40 mmHg                                                  |                                             | <b>0.73 (0.63,0.84)</b>                                                                      |
| <b><i>OR Decompressive Craniectomy</i></b>                         |                                             |                                                                                              |
| No= No DC for high ICP or/and EDH or/and SDH or/and cerebral edema | 1.00 (Ref)                                  |                                                                                              |

|                                                                                                                                                            |                           |  |
|------------------------------------------------------------------------------------------------------------------------------------------------------------|---------------------------|--|
| Yes= DC for high ICP <i>or/and</i> EDH <i>or/and</i> SDH <i>or/and</i> cerebral edema                                                                      | 1.65 (0.38, 7.29)         |  |
| No surgery, high ICP <i>or/and</i> EDH <i>or/and</i> SDH <i>or/and</i> cerebral edema †                                                                    | <b>5.33 (3.44, 8.24)</b>  |  |
| No surgery, no high ICP, no EDH, no SDH, no cerebral edema †                                                                                               | 2.52 (0.67, 9.43)         |  |
| <b>ICU Early nutrition start</b>                                                                                                                           |                           |  |
| Start after 72 hours of TBI                                                                                                                                | 1.00 (Ref)                |  |
| Start within 72 hours of TBI                                                                                                                               | <b>0.06 (0.01, 0.26)*</b> |  |
| <b>ICU PaCO<sub>2</sub> &gt; 30mmHg in absence of herniation &amp; PaCO<sub>2</sub> ≤ 30mmHg in presence of herniation (abnormal pupil or CT evidence)</b> |                           |  |
| HERNIATION PRESENT                                                                                                                                         |                           |  |
| PaCO <sub>2</sub> >30 mmHg                                                                                                                                 | 1.00 (Ref)                |  |
| PaCO <sub>2</sub> ≤ 30 mmHg                                                                                                                                | <b>11.8 (3.7, 37.9)</b>   |  |
| NO HERNIATION                                                                                                                                              |                           |  |
| PaCO <sub>2</sub> ≤ 30 mmHg                                                                                                                                | 1.00 (Ref)                |  |
| PaCO <sub>2</sub> > 30 mmHg                                                                                                                                | <b>0.22 (0.06,0.81)</b>   |  |

\* No difference when mortality model run excluding subjects with abdominal injuries.

\*\* This model excludes those with any surgery and no high ICP or EDH or SDH or cerebral edema because none of the 7 people in this group died.

All models adjusted for age, sex, head abbreviated injury severity (AIS) score, motor Glasgow coma scale score, and maximum non-head AIS. Mortality model not adjusted for ICU LOS whereas GOS model is adjusted for ICU LOS.

--- = indicator not in model.

PH = Pre-hospital, ED = Emergency Department, OR = Operating Room, ICU = Intensive Care unit.
